# Supplementary material for: Extracellular Proteome Analysis and Flavor Formation During Soy Sauce Fermentation
Source: Front Microbiol. 2018 Aug 15;9:1872. doi: 10.3389/fmicb.2018.01872 (PMC6104182; doi:10.3389/fmicb.2018.01872)
Supplement: Supplementary file 2 [file Table_2.XLSX]

## Sheet: table s2
Table s2 Identified proteins of Glycine max during soy sauce koji fermentation.
Protein accession	Protein description	Gene name	MW [kDa]	calc.pI	Score	Coverage [%]	#Peptides	#PSMs	#Unique peptides
I1LN44	Uncharacterized protein	I1LN44	16.56	9.52	42	11.9	2	2	2
I1LWM2	Uncharacterized protein	I1LWM2	52.48	4.8	101	22	7	10	3
I1K554	Uncharacterized protein	I1K554	10.02	9.49	55	23	2	4	2
P29531	P24 oleosin isoform B	P29531	25.67	8.89	370	25.6	6	33	1
I1JI64	Uncharacterized protein	I1JI64	37.98	8.72	60	3.2	1	2	1
I1M0P6	Uncharacterized protein	I1M0P6	18.9	8.03	43	17	2	2	2
I1NH59	Uncharacterized protein	I1NH59	31.39	4.78	152	36.3	5	6	2
I1LGG2	Glutathione peroxidase	I1LGG2	23.02	5.88	157	17.4	3	13	2
C6TAX7	Uncharacterized protein	C6TAX7	33.09	5.53	57	12.1	3	6	3
Q01417	18 kDa seed maturation protein	GMPM1	21.03	9.58	414	33.5	7	35	4
I1JPP3	Uncharacterized protein	I1JPP3	102.8	5.13	69	7.4	6	7	6
C6TBX7	Uncharacterized protein	C6TBX7	12.71	9.79	31	18.8	2	4	1
P04405	Glycinin G2	Gy2	59.51	5.46	4908	46	17	188	11
I1N8I7	Uncharacterized protein	I1N8I7	19.43	4.15	331	38.3	5	15	5
I1KVT5	Uncharacterized protein	I1KVT5	18.35	5.76	37	11	2	3	2
I1J7G5	Uncharacterized protein	I1J7G5	21.77	4.92	284	39.4	6	15	3
I1KU21	Uncharacterized protein	I1KU21	108.47	5.8	186	2.5	3	16	3
I1JPV0	Uncharacterized protein	I1JPV0	43.71	5.89	1241	61.2	21	107	15
I1L9A4	Uncharacterized protein	I1L9A4	24.05	8.98	44	10.5	1	2	1
Q04672	Sucrose-binding protein	SBP	69.59	6.42	750	14.7	9	42	3
I1JFL5	Uncharacterized protein	I1JFL5	16.55	6.05	248	38.2	5	22	5
K7K4G2	Uncharacterized protein	K7K4G2	84.82	5.42	336	16.3	11	17	5
I1L1J3	Uncharacterized protein	I1L1J3	50.88	4.39	36	5.5	2	2	2
Q9SB11	Glycinin	A5A4B3	70.63	5.17	5313	52.8	22	201	19
K7KXX0	Uncharacterized protein	K7KXX0	148.65	8.74	1517	37.1	38	116	38
A0A762	Calreticulin-1	Gm	58.86	4.43	189	12.6	5	15	2
K7L8B5	Uncharacterized protein	K7L8B5	16.88	4.45	295	37.2	5	15	1
P04776	Glycinin G1	GY1	62.26	5.89	3152	38.4	17	199	12
I1M395	Uncharacterized protein	I1M395	10.47	8.1	40	32.9	2	2	2
Q9XES8	Seed maturation protein PM28	PM28	10.88	4.66	1653	87.6	7	47	7
C6T1V2	Uncharacterized protein	C6T1V2	20.94	6.33	352	29.9	4	13	4
K7KFX8	Uncharacterized protein	K7KFX8	20.08	5.11	93	27.2	4	5	4
P25974	Beta-conglycinin, beta chain	CG-4	55.62	5.88	1338	31	16	91	2
Q9XET0	Seed maturation protein PM30	PM30	19.27	8.95	1870	87.1	19	140	19
K7MF41	Uncharacterized protein	K7MF41	90.75	8.53	41	5.1	3	3	2
I1MFN6	Uncharacterized protein	I1MFN6	20.84	3.97	89	13.8	2	3	2
I1LN49	Uncharacterized protein	I1LN49	30.48	6.56	63	10.3	2	2	2
P05478	18.5 kDa class I heat shock protein	HSP18.5-C	22.39	5.82	153	37.9	6	12	2
K7LEQ5	Uncharacterized protein	K7LEQ5	29.88	6.29	4827	82.2	15	231	12
C6SW11	Uncharacterized protein	C6SW11	17.8	5.34	53	15.5	2	4	2
I1JLC8	Protein SLE2	SLE2	13.79	5.53	1798	78.1	10	95	8
I1L3Q3	Uncharacterized protein	I1L3Q3	16.19	6.38	44	13.6	2	4	2
Q39801	51 kDa seed maturation protein	Q39801	68.02	6.65	5497	71.9	49	442	35
I1M361	Uncharacterized protein	I1M361	14.12	5.24	122	43.5	4	7	3
I1K2B4	Uncharacterized protein	I1K2B4	12.05	5.09	516	42.4	3	25	1
K7N0P4	Uncharacterized protein	K7N0P4	13.39	6.73	165	33.1	3	7	3
P13917	Basic 7S globulin	BG	50.08	8.68	189	10.3	4	7	4
P01070	Trypsin inhibitor A	KTI3	27.48	4.99	965	37	9	71	8
I1KZ18	Uncharacterized protein	I1KZ18	10.6	6.63	77	22	2	3	2
I1M005	Uncharacterized protein	I1M005	48.63	7.22	224	12.3	6	19	6
Q39873	Lea protein	Q39873	65.98	7.08	6159	70.3	48	444	34
I1JH86	Fructose-bisphosphate aldolase	I1JH86	43.97	7.12	102	8.4	3	5	3
I1KWV5	Uncharacterized protein	I1KWV5	45.3	4.79	30	4.7	2	2	2
I1L957	Uncharacterized protein	I1L957	64.35	6.12	5334	63	33	290	19
I1M222	Uncharacterized protein	I1M222	31.34	5.5	1034	51.1	16	101	16
I1M1I0	Uncharacterized protein	I1M1I0	198.23	6.21	28	0.4	1	2	1
C6SX87	Uncharacterized protein	C6SX87	15.76	9.37	48	7.1	1	2	1
Q4LER6	Beta-conglycinin alpha prime subunit	Cgy-1	82.55	5.5	2225	38	22	139	16
Q39871	Late embryogenesis abundant protein	MP2	67.34	6.33	3544	58.5	31	215	18
K7KM30	Uncharacterized protein	K7KM30	13.18	4.5	30	8.5	1	2	1
I1KAB7	Protein disulfide-isomerase	I1KAB7	66.45	4.88	523	31.2	15	43	2
I1NAI0	Uncharacterized protein	I1NAI0	18.95	4.89	99	28.8	4	8	4
I1KDL8	Uncharacterized protein	I1KDL8	15.94	6.1	32	9.2	1	2	1
K7MID0	Uncharacterized protein	K7MID0	112.32	5.94	1258	34.2	26	82	13
K7LNF6	Uncharacterized protein (Fragment)	K7LNF6	46.13	6.64	277	28.5	9	21	9
P25698	Elongation factor 1-alpha	TEFS1	61.15	9.14	119	8.1	4	13	3
I1JE78	Uncharacterized protein	I1JE78	65.05	8.16	45	1.4	2	3	2
I1JIE0	Ferritin	I1JIE0	32.24	6.41	90	12	3	4	3
C6SWW4	Uncharacterized protein	C6SWW4	25.47	4.85	131	24.1	6	12	5
I1LHR9	Uncharacterized protein	I1LHR9	15.24	6.82	232	36	2	12	2
Q01527	Maturation protein	gGmpm9	18.78	9.66	917	39.5	6	43	2
I1MQD2	Uncharacterized protein	I1MQD2	14.92	5.74	2425	60.2	5	110	5
Q9ZTZ2	Late embryogenesis abundant protein	PM16	18.11	9.27	79	21.8	4	15	2
I1LPN7	Uncharacterized protein	I1LPN7	20.52	6.28	389	22	3	12	3
I1M3M9	Uncharacterized protein	I1M3M9	82.2	6.18	2810	56	34	150	33
O22443	Peroxidase	Ep	40.43	4.98	135	6.8	2	5	2
Q94LX2	Beta-conglycinin alpha subunit	Q94LX2	79.03	5.12	1526	37.9	21	120	15
C6T0L2	Protein SLE3	SLE3	13.43	6.3	1523	61.4	8	79	4
C6SYC1	Uncharacterized protein	C6SYC1	24.72	5.2	64	17.9	3	5	3
I1MTE2	Uncharacterized protein	I1MTE2	19.36	9.45	82	10.6	2	3	2
I1K0G0	Uncharacterized protein	I1K0G0	51.24	4.89	72	9.3	4	5	1
I1JSX0	Uncharacterized protein	I1JSX0	13.48	5.12	1157	47.5	5	44	5
K7L730	Uncharacterized protein	K7L730	17.2	9.19	413	50.8	8	36	8
I7FST9	Protein disulfide-isomerase	Gm	69.5	5.06	570	32.2	16	43	3
I1MKY3	Uncharacterized protein	I1MKY3	17.4	6.24	69	41.1	4	7	3
C6TJF3	Uncharacterized protein	C6TJF3	44.82	5	88	13.2	4	6	4
Q7M1R5	Superoxide dismutase [Cu-Zn]	SOD1	16.44	5.27	133	19.7	3	7	1
I1N2Z5	Protein SLE1	SLE1	14.53	5.33	680	67	9	45	6
I1L6T4	Uncharacterized protein	I1L6T4	47.81	5.59	81	5.8	2	6	2
I1NF03	Uncharacterized protein	I1NF03	63.2	4.48	144	11.8	5	12	2
I1JU53	Uncharacterized protein	I1JU53	13.22	6.15	58	19	2	3	2
I1JSF3	Uncharacterized protein	I1JSF3	20.61	5.92	99	8.2	1	3	1
K7N277	Uncharacterized protein	K7N277	14.31	10.88	713	35.5	2	7	2
I1LVC1	Uncharacterized protein	I1LVC1	18.07	5.54	1021	34.8	3	32	2
Q9ZNZ4	Napin-type 2S albumin 1	Q9ZNZ4	21.83	6	1670	57.4	9	107	9
I1KPY5	Lactoylglutathione lyase	I1KPY5	45.24	6.56	77	3.1	1	3	1
K7LDT9	Uncharacterized protein	K7LDT9	120.06	6.26	1294	40.5	34	89	29
I1JF86	Uncharacterized protein	I1JF86	66.6	6.16	692	24.1	13	42	9
I1K5M9	Uncharacterized protein	I1K5M9	71.72	5.33	117	7.6	3	4	3
C6SZ13	Uncharacterized protein	C6SZ13	17.14	9.34	166	17.7	3	7	3
C6TKH0	Uncharacterized protein	C6TKH0	36.68	6.38	200	18.7	5	12	5
I1KRJ7	Uncharacterized protein	I1KRJ7	29.58	6.44	152	33.5	6	19	6
K7LP96	Uncharacterized protein	K7LP96	17.35	5.49	236	21.1	3	13	2
B3TDK6	Lipoxygenase	Lx3	108.79	6.12	421	15.3	14	28	9
Q42447	Maturation protein	MAT1	28.85	6.02	1334	54.7	12	83	9
I1K4S0	Uncharacterized protein	I1K4S0	35.76	6.09	95	7.9	2	5	2
I1N7G4	Uncharacterized protein	I1N7G4	70.13	6.38	83	3.3	2	4	2
I1JMQ3	Uncharacterized protein	I1JMQ3	46.24	5.85	173	27.4	8	13	7
I1LKJ8	Uncharacterized protein	I1LKJ8	56.28	5.9	83	5	2	3	2
I1JG11	Uncharacterized protein	I1JG11	46.68	5.31	93	14.6	6	7	6
I1JGV5	Uncharacterized protein	I1JGV5	22.1	4.42	128	36.2	7	10	5
I1L849	Uncharacterized protein	I1L849	30.93	5.16	1782	80.5	16	91	16
C6T107	Uncharacterized protein	C6T107	16.27	4.92	100	32.5	4	5	2
I1MPM4	Uncharacterized protein	I1MPM4	170.85	5.77	87	1.9	3	6	3
C6SWV3	Uncharacterized protein	C6SWV3	31.51	5.72	125	9.8	2	6	2
I1LNN8	Uncharacterized protein	I1LNN8	46.88	9.35	92	4.2	1	3	1
C6ZHS4	Eukaryotic translation initiation factor 5A	C6ZHS4	21.58	5.6	100	7.5	1	4	1
P11828	Glycinin G3	GY3	59.42	5.73	1281	33.3	12	81	7
I1LE33	Uncharacterized protein	I1LE33	77.1	5.94	769	22.1	12	54	10
K7KXQ8	Uncharacterized protein	K7KXQ8	10.36	8.7	45	14.5	1	2	1
K7M2H6	Uncharacterized protein	K7M2H6	24.55	5.43	3107	40.5	8	140	8
P05046	Lectin	LE1	34.58	5.65	504	17.2	4	16	4
Q01915	ATP synthase subunit alpha, mitochondrial	ATPA	61.31	6.23	42	2.2	1	2	1
I1NH02	Uncharacterized protein	I1NH02	40.67	4.87	41	5.4	2	3	2
C6SYM8	Uncharacterized protein	C6SYM8	24.84	4.99	174	22.5	3	7	3
I1LDP9	60S ribosomal protein L36	I1LDP9	17.66	11.32	35	14.5	2	3	2
I1N466	Uncharacterized protein	I1N466	46.73	6.07	172	17	6	10	2
I1KZ09	Uncharacterized protein	I1KZ09	48.2	8.59	39	2.5	1	2	1
I1MIA8	Uncharacterized protein	I1MIA8	16.78	4.43	221	37.2	5	14	1
I1LMS5	Ribosomal protein	I1LMS5	38.2	9.68	35	4.2	1	2	1
I1J4S9	Uncharacterized protein	I1J4S9	36.17	6.04	26	8.6	2	2	2
I1LXD1	Uncharacterized protein	I1LXD1	45.55	8.19	37	9	3	3	3
I1K8X7	Uncharacterized protein	I1K8X7	29.6	6.38	70	5	1	3	1
I1JGP8	Uncharacterized protein	I1JGP8	69.21	6.69	75	3.3	2	4	2
I1L3Q2	Uncharacterized protein	I1L3Q2	14.51	5.2	113	15.6	2	8	2
I1JFW6	Uncharacterized protein	I1JFW6	26.06	9.51	98	7.4	1	2	1
I1LTB6	Uncharacterized protein	I1LTB6	53.91	5.51	183	13.9	5	9	5
I1N0K3	Uncharacterized protein	I1N0K3	14.33	9.56	217	29.8	3	13	2
I1LV24	Uncharacterized protein	I1LV24	14.35	5.8	56	19	2	6	1
I1K3K3	Urease	I1K3K3	101.97	5.7	34	1.7	2	2	2
I1M786	Uncharacterized protein	I1M786	29.59	4.53	84	14.8	3	7	3
I1M0K3	Uncharacterized protein	I1M0K3	32.52	6.57	165	19.2	5	15	5
I1MJC7	Phosphoglycerate kinase	I1MJC7	50.89	5.96	192	10.5	3	7	2
I1KL73	Uncharacterized protein	I1KL73	55.93	5.17	51	5.5	2	2	2
C6T073	Uncharacterized protein	C6T073	25.85	8.74	56	11.7	2	3	2
I1L860	Uncharacterized protein	I1L860	66.83	6.08	756	22	11	42	4
I1L2M6	Uncharacterized protein	I1L2M6	26.88	6.17	169	28.8	4	12	3
I1K198	Uncharacterized protein	I1K198	18.56	9.37	48	20.2	3	4	3
I1KUB7	Uncharacterized protein	I1KUB7	20.15	5.33	58	36.1	5	6	3
I1LWB8	Uncharacterized protein	I1LWB8	29.8	4.51	132	8.5	2	10	2
C6TFC1	Non-specific lipid-transfer protein	C6TFC1	14.99	9.01	170	39.3	4	8	4
I1NAL2	Uncharacterized protein (Fragment)	I1NAL2	15.52	4.6	190	22.5	4	8	2
I1JWB7	Uncharacterized protein	I1JWB7	41.09	4.86	142	21.3	5	6	3
I1L7H7	Malate dehydrogenase	I1L7H7	30.34	6.52	75	5.4	2	4	2
I1MC31	Uncharacterized protein	I1MC31	118.52	4.91	30	2.1	3	3	3
P04347	Glycinin	P04347	62.96	5.6	2094	31.6	10	81	1
I1JAY8	Uncharacterized protein	I1JAY8	84.56	5.52	84	5.4	3	4	3
Q9S7N8	Seed maturation protein PM21	PM21	12.35	4.91	817	86.3	6	38	4
I1NA39	Lambda class glutathione S-transferase	GSTL7	31.63	5.49	68	15.6	4	5	4
C6TMA8	Uncharacterized protein	C6TMA8	15.44	4.69	1123	64.7	5	49	3
C6T588	Uncharacterized protein	C6T588	20.47	4.73	828	63.3	8	45	8
I1LQT0	Histone H2B	I1LQT0	23.37	10.08	65	6	1	3	1
K7LSN8	Peptidyl-prolyl cis-trans isomerase	K7LSN8	28.7	9.01	62	12	2	2	2
I1MWP3	Histone H2A	I1MWP3	18.19	10.39	63	7.5	1	5	1
I1J8K2	Uncharacterized protein	I1J8K2	49.41	4.58	93	3.7	1	2	1
I1N1Y7	Uncharacterized protein	I1N1Y7	10.14	6.64	170	37.8	3	9	3
I1MLA2	Uncharacterized protein	I1MLA2	17.15	4.72	50	19	2	2	2
I1KV72	Uncharacterized protein	I1KV72	20.59	4.09	109	25.1	2	3	2
I1MBR7	Uncharacterized protein	I1MBR7	60.49	5.2	107	5.5	2	3	2
C6SZA3	Uncharacterized protein	C6SZA3	10.88	6.18	98	48.1	3	6	1
I1LTT3	Uncharacterized protein	I1LTT3	13.46	4.33	289	27.9	4	13	2
I1MG42	Uncharacterized protein	I1MG42	13.38	6.49	221	25.2	3	13	3
I1M0W1	Uncharacterized protein	I1M0W1	18.85	5.52	933	34.5	3	26	2
I1LN27	Uncharacterized protein	I1LN27	16.55	4.91	146	20	2	3	2
I1J584	Uncharacterized protein	I1J584	24.53	6.43	69	9.5	2	3	2
I1MQB5	Uncharacterized protein	I1MQB5	31.15	9.66	47	5.5	1	3	1
I1LHP6	Uncharacterized protein	I1LHP6	97.81	5.32	199	18.1	14	22	8
I1KAR6	Uncharacterized protein	I1KAR6	42.59	5.61	42	4	1	2	1
I1JHQ1	Uncharacterized protein	I1JHQ1	67.86	6	128	3.7	2	7	2
I1LNM2	NADH dehydrogenase subunit 9	nad9	25.3	7.71	75	12.6	2	3	2
I1KH44	Uncharacterized protein	I1KH44	20.23	5.2	69	15.3	2	3	2
I1KGU0	40S ribosomal protein S12	I1KGU0	18.21	5.5	45	18.9	2	3	2
I1M2K9	Uncharacterized protein	I1M2K9	84.47	5.68	37	12.8	9	9	8
I1MQ89	Uncharacterized protein	I1MQ89	57.63	6.06	229	13.9	5	13	2
I1LJC9	Uncharacterized protein	I1LJC9	17.15	5.85	125	15.4	2	9	1
I1JWB8	Uncharacterized protein	I1JWB8	41.19	4.86	183	21.2	5	8	3
I1K832	Uncharacterized protein	I1K832	18.08	4.28	90	11.8	2	3	1
K7LZA4	Uncharacterized protein	K7LZA4	60.38	5.46	3144	40.1	12	104	3
I1K1K4	Oleosin	I1K1K4	20.07	8.07	99	13.8	2	6	2
I1MCN3	Uncharacterized protein	I1MCN3	112.73	5.13	73	2.8	2	3	2
C6T1E4	Uncharacterized protein	C6T1E4	13.95	4.3	370	45.6	6	18	3
I1MJL6	Uncharacterized protein	I1MJL6	34.85	10.15	44	11.6	3	6	2
C6TG97	Proteasome subunit alpha type	C6TG97	31.66	5.6	38	4	1	2	1
I1JRI7	Superoxide dismutase [Cu-Zn]	I1JRI7	16.72	5.6	198	26.3	4	13	2
I1MMH4	Uncharacterized protein	I1MMH4	50.7	5.19	112	11.1	4	8	4
I1LRP3	Uncharacterized protein	I1LRP3	29.89	9.06	33	8.6	2	2	2
I1LSZ7	Proteasome subunit alpha type	I1LSZ7	31.63	5.59	71	8.1	2	4	2
I1K9V8	Uncharacterized protein	I1K9V8	33.12	4.66	80	17	4	7	4
P27066	Ribulose bisphosphate carboxylase large chain	rbcL	58.76	6	96	6.1	3	6	3
I1NAH1	Uncharacterized protein	I1NAH1	35.49	6.58	245	25.8	7	18	3
I1NGT2	Uncharacterized protein	I1NGT2	70.56	4.83	44	6.1	3	3	3
C6TH20	Uncharacterized protein	C6TH20	46.23	5.95	228	15.8	5	9	1
I1LKD3	Uncharacterized protein	I1LKD3	61.08	5.73	68	5.9	2	5	2
I1LBZ3	Uncharacterized protein	I1LBZ3	20.86	4.57	38	11.8	2	3	2
K7LNW5	Uncharacterized protein	K7LNW5	29.4	7.03	160	23.2	5	10	5
C6TMV9	Uncharacterized protein	C6TMV9	37.34	8.31	71	8.2	2	3	1
I1KZW3	Uncharacterized protein	I1KZW3	35.42	5.63	52	10.6	3	4	3
I1J9Y0	Uncharacterized protein	I1J9Y0	79.94	6.07	131	6.2	3	6	3
I1ML66	Glyceraldehyde-3-phosphate dehydrogenase	I1ML66	50.34	7.62	67	2.7	1	2	1
Q9XER5	Seed maturation protein PM22	PM22	20.4	5.16	95	41.4	8	15	8
I1LR42	Uncharacterized protein	I1LR42	102.44	4.47	57	1.3	1	2	1
C6TKN4	Uncharacterized protein	C6TKN4	37.86	4.59	53	9.1	2	2	2
I1NI03	Uncharacterized protein	I1NI03	28.1	5.9	137	7	1	3	1
C6T2C2	Uncharacterized protein	C6T2C2	22.09	4.42	116	22.2	3	6	3
I1KPN3	Uncharacterized protein	I1KPN3	88.33	5.08	298	13	6	12	5
I1JFN3	Uncharacterized protein	I1JFN3	16.93	4.66	156	29.2	3	7	2
I1NDJ4	Uncharacterized protein	I1NDJ4	15.72	5.13	495	65.6	5	25	3
I1LE41	Uncharacterized protein	I1LE41	28.8	4.75	3017	71.1	10	79	8
I1LFD6	DHAR class glutathione S-transferase	DHAR1	28.3	5.98	65	3.8	1	4	1
I1MXZ6	Uncharacterized protein	I1MXZ6	16.23	4.76	92	37.4	5	7	5
K7MLT6	Uncharacterized protein	K7MLT6	10.06	4.71	70	33.3	2	3	2
I1NGG4	Uncharacterized protein	I1NGG4	29.14	4.9	4747	83.2	13	140	11
C6TJG0	Uncharacterized protein	C6TJG0	32.14	6.77	127	30.4	6	11	6
C6SWA9	Uncharacterized protein	C6SWA9	13.73	4.36	300	45.6	6	15	3
I1LN92	Uncharacterized protein	I1LN92	25.37	10.24	50	10.5	2	2	2
I1LKF8	Uncharacterized protein	I1LKF8	20.35	4.27	212	43.6	5	12	5
I1J5S9	Uncharacterized protein	I1J5S9	21.65	4.75	80	13.1	2	3	2
C6T9F2	Uncharacterized protein	C6T9F2	43.32	4.86	113	13.7	3	5	2
I1JN99	Uncharacterized protein	I1JN99	17.77	4.58	176	38.9	4	6	4
C6T491	Uncharacterized protein	C6T491	14.3	5.35	51	26.3	3	4	3
C6T4J1	Uncharacterized protein	C6T4J1	12.7	6.28	53	55.7	5	7	5
I1JM67	Peptidyl-prolyl cis-trans isomerase	I1JM67	19.53	6.3	160	36.7	4	7	4
I1MTR0	Uncharacterized protein	I1MTR0	69.15	6.5	60	2	1	2	1
I1LUL9	Ketol-acid reductoisomerase	I1LUL9	71.02	6.85	50	1.7	1	2	1
I1KZZ6	Uncharacterized protein	I1KZZ6	22.31	4.02	80	6.8	1	2	1
O23957	Dehydrin	GmPM12	20.06	9.22	1884	39.2	5	56	5
K7K8J7	Uncharacterized protein (Fragment)	K7K8J7	16.18	5.48	137	31.2	3	4	2
Q8RVH5	Basic 7S globulin 2	Q8RVH5	51.07	8.58	71	6	3	6	3
I1LQR4	Uncharacterized protein	I1LQR4	84.05	5.1	181	14.2	8	16	1
I1N783	Proteasome subunit alpha type	I1N783	31.73	5.6	47	4	1	3	1
I1KDM8	Malate dehydrogenase	I1KDM8	41.92	8.22	69	4.6	1	2	1
I1KZJ0	Uncharacterized protein	I1KZJ0	54.79	5.87	96	2.7	1	6	1
I1KID4	Uncharacterized protein	I1KID4	29.03	8.43	242	42.4	7	13	5
P08170	Seed linoleate 13S-lipoxygenase-1	LOX1.1	106	5.95	232	14.4	11	28	7
I1MAW4	Uncharacterized protein	I1MAW4	22.21	4.37	99	25.1	5	7	3
B0M1A4	Catalase	B0M1A4	62.54	6.77	47	5.5	2	3	2
I1KDL4	Phosphoenolpyruvate carboxylase	Gmppc2	122.5	5.72	44	2.5	2	2	2
K7K5Q8	Uncharacterized protein	K7K5Q8	24.23	6.36	41	10.9	2	6	2
I1N334	Uncharacterized protein	I1N334	41.98	6.27	34	8.7	4	4	4
I1LC12	Uncharacterized protein	I1LC12	26.04	5.74	63	5.6	1	2	1
I1L8V4	Uncharacterized protein (Fragment)	I1L8V4	18.2	8.04	254	27.4	3	11	3
Q9FEC5	Glycinin subunit G7	Gy7	68.75	6.49	71	6.3	3	4	3
I1JRR6	Uncharacterized protein	I1JRR6	30.93	7.1	47	5	1	2	1
I1KHZ4	Uncharacterized protein	I1KHZ4	41.34	9.24	45	3	1	2	1
C6TFY7	Uncharacterized protein	C6TFY7	13.35	7.98	72	61.9	6	6	6
C6TNT2	EF1Bgamma class glutathione S-transferase	EF1Bgamma3	56.95	5.92	49	7.2	2	3	2
I1LZ93	Isocitrate dehydrogenase [NAD] subunit, mitochondrial	I1LZ93	44.24	6.8	81	5	1	2	1
I1KND9	Uncharacterized protein	I1KND9	31.6	5.34	246	14.4	3	9	2
I1JQ73	Uncharacterized protein	I1JQ73	27.97	5.24	77	6.1	2	6	2
I1L235	Uncharacterized protein	I1L235	42.65	4.56	33	7.4	2	2	2
I1LL25	Uncharacterized protein	I1LL25	70.89	5.23	217	12	6	12	6
I1N747	Oleosin	I1N747	25.87	8.89	362	32.3	8	39	3
I1JMQ0	Nucleoside diphosphate kinase	I1JMQ0	18.83	6.3	43	10.7	1	2	1
C6T3N0	Uncharacterized protein	C6T3N0	8.87	7.82	48	17.1	1	2	1
C6T0H9	Uncharacterized protein	C6T0H9	18.84	10.4	30	7.1	1	2	1
I1JIL1	Uncharacterized protein	I1JIL1	21.95	5.91	41	11.3	2	4	2
I1LBH3	Uncharacterized protein	I1LBH3	35.16	6.48	40	3.9	1	2	1
I1L8R1	Uncharacterized protein	I1L8R1	55.03	10.45	39	1.5	1	2	1
I1K8F1	Uncharacterized protein	I1K8F1	21.52	6.62	81	17.1	3	6	2
I1JMZ4	Uncharacterized protein	I1JMZ4	25.9	4.3	31	15.2	2	2	2
C6TGA6	Uncharacterized protein	C6TGA6	40.87	5.02	46	10.3	2	2	2
I1KTK0	Uncharacterized protein	I1KTK0	34.81	10.07	45	11.6	3	4	2
I1LIT2	Uncharacterized protein	I1LIT2	100.56	5.44	174	5.6	4	12	3
I1JSN3	Uncharacterized protein	I1JSN3	32.67	6.92	74	3.9	1	2	1
I1JBF6	ATP-dependent Clp protease proteolytic subunit	I1JBF6	37.45	8.67	61	3.9	1	3	1
I1LKZ3	Superoxide dismutase [Cu-Zn]	I1LKZ3	22.82	6.03	134	17.2	3	7	3
I1KYK0	Uncharacterized protein	I1KYK0	51.4	5.81	110	12.3	3	3	3
K7KQN8	Uncharacterized protein	K7KQN8	95.73	5.87	47	4.6	3	4	3
I1LDS8	Uncharacterized protein	I1LDS8	30.21	4.99	43	4.3	1	2	1
Q9XET1	Seed maturation protein PM31	PM31	20.89	6.1	416	52.3	6	29	5
I1JKB3	Uncharacterized protein	I1JKB3	29.18	6.41	85	32.5	5	5	3
I1LFK7	Uncharacterized protein	I1LFK7	36.72	9.17	54	2.1	1	4	1
I1LIN2	Uncharacterized protein	I1LIN2	185	4.68	60	3.8	5	5	3
I1MYB0	Uncharacterized protein	I1MYB0	59.53	5.67	34	5.8	2	2	2
I1J8D4	Uncharacterized protein	I1J8D4	58.46	4.77	54	7.6	3	3	3
I1JVP6	Uncharacterized protein	I1JVP6	42.46	4.56	67	10.8	3	6	3
C6SXV7	Uncharacterized protein	C6SXV7	12.59	6.23	105	37.8	4	5	4
I1L8Q0	Lambda class glutathione S-transferase	GSTL3	31.25	5.34	38	8.9	2	2	2
I1KSB8	Uncharacterized protein	I1KSB8	20.53	10.72	61	15.8	2	2	2
C6SX83	Nascent polypeptide-associated complex subunit beta	C6SX83	21.81	6.75	67	21	3	3	3
I1JXJ3	Uncharacterized protein	I1JXJ3	29.61	4.42	58	11.3	4	6	4
I1J717	Proteasome subunit alpha type	I1J717	29.5	5.51	144	15.7	4	8	4
I1ML97	Alpha-mannosidase	I1ML97	131.3	5.6	53	2	2	3	2
I1KEM1	Uncharacterized protein	I1KEM1	20.33	9.84	54	21.1	3	5	3
C6TMB5	Uncharacterized protein	C6TMB5	22.52	9.05	177	33.7	4	6	1
K7LQI7	Uncharacterized protein	K7LQI7	15.9	5.56	261	40.3	4	11	4
I1KTX8	Phosphoglycerate kinase	I1KTX8	58.94	7.79	247	11.1	4	9	3
I1KZ37	Uncharacterized protein	I1KZ37	8.88	9.25	76	18.3	1	5	1
I1M2Y5	Uncharacterized protein	I1M2Y5	43.51	6.25	107	12.1	4	6	4
K7LQG0	Uncharacterized protein	K7LQG0	25.58	8.39	130	29.2	4	6	1
I1LZ51	Uncharacterized protein	I1LZ51	60.76	6.97	33	3.1	2	2	2
Q43758	Ascorbate peroxidase	apx1	31.68	5.51	30	7.6	2	3	2
F7J077	Beta-conglycinin beta subunit	CG-beta-2	55.51	5.88	1465	34.4	17	104	1
I1M903	Uncharacterized protein	I1M903	73.96	5.54	139	14.8	8	9	2
I1KH24	Phospholipase D	I1KH24	101.57	5.48	65	1.2	1	2	1
K7MF92	Uncharacterized protein	K7MF92	33.95	7.01	58	4.2	1	4	1
I1LYA4	Eukaryotic translation initiation factor 3 subunit K	I1LYA4	28.79	5.48	42	2.6	1	2	1
I1LAJ3	Uncharacterized protein	I1LAJ3	42.34	7.6	61	4.6	1	2	1
I1N318	Proteasome subunit alpha type	I1N318	31.86	6.62	51	8.8	2	3	2
I1JFA3	Uncharacterized protein	I1JFA3	33.19	9.63	26	5.3	2	2	2
I1J9Y5	Uncharacterized protein	I1J9Y5	19.05	4.75	71	28.6	4	5	4
I1K602	Profilin	I1K602	16.04	5.14	52	7.5	1	3	1
I1K601	Profilin	I1K601	15.79	4.6	55	7.6	1	2	1
I1KZY9	Uncharacterized protein	I1KZY9	50.64	5.84	37	1.4	1	2	1
I1K173	Uncharacterized protein	I1K173	38.98	6.84	38	5	1	2	1
I1LN85	Uncharacterized protein	I1LN85	26.71	5.07	50	4	1	2	1
I1JPV5	Pyruvate kinase	I1JPV5	67.42	6.62	34	1.1	1	2	1
I1KXH0	Uncharacterized protein	I1KXH0	42.11	4.83	76	3.9	1	3	1
I1LP72	Uncharacterized protein	I1LP72	53.73	5.24	41	1.4	1	2	1
I1LCJ1	ATP-dependent 6-phosphofructokinase	PFK	65.89	8.55	37	1	1	3	1
I1JMB4	Glyceraldehyde-3-phosphate dehydrogenase	I1JMB4	52.07	8.71	106	9.1	4	9	3
I1KHP5	Pyruvate dehydrogenase E1 component subunit alpha	I1KHP5	54.73	6.41	40	3.9	2	2	2
I1JD07	40S ribosomal protein S27	I1JD07	11.78	9.07	26	19.8	1	1	1
Q8LJW0	40S ribosomal protein S4	Q8LJW0	36.7	10.27	25	2.3	1	1	1
I1JM69	40S ribosomal protein S8	I1JM69	32.26	10.37	29	4.1	1	3	1
I1M1B6	Acyl carrier protein	I1M1B6	17.35	5.23	34	10.8	1	1	1
I1K3S4	Adenosylhomocysteinase	I1K3S4	63.71	5.79	41	2.6	1	1	1
I1LWR4	Alpha-1,4 glucan phosphorylase	I1LWR4	126.35	5.54	66	1.1	1	1	1
I1LLC0	Annexin	I1LLC0	42.75	8.22	66	3.8	1	1	1
I1LRU3	Beta-amylase	I1LRU3	63.22	5.27	28	2.8	1	1	1
I1KBP5	Beta-galactosidase	I1KBP5	88.55	5.05	34	1.7	1	1	1
I1L7G1	Cyanate hydratase	CYN	21.66	6.43	27	5.5	1	2	1
I1NC67	Cysteine synthase	I1NC67	40.82	5.5	36	2.5	1	1	1
I1LZM2	Defective in cullin neddylation protein	I1LZM2	32.71	6.36	28	3.1	1	4	1
I1MQS6	EF1Bgamma class glutathione S-transferase	EF1Bgamma4	57.34	6.1	30	2.1	1	1	1
C6ZHS3	Eukaryotic translation initiation factor 5A	C6ZHS3	21.28	5.6	35	7.5	1	1	1
I1JL80	Ferritin	I1JL80	33.53	5.94	27	3.9	1	1	1
I1L431	Glutamine synthetase	I1L431	38.02	5.08	25	3.9	1	1	1
I1K6J6	Glutathione peroxidase	I1K6J6	23.12	6.59	104	12	2	8	1
I1K135	Glyceraldehyde-3-phosphate dehydrogenase	I1K135	43.49	8.18	103	13.9	5	10	1
I1KC70	Glyceraldehyde-3-phosphate dehydrogenase	I1KC70	43.93	6.72	125	15.1	5	10	1
I1MYI8	Glyceraldehyde-3-phosphate dehydrogenase	I1MYI8	43.8	6.97	165	16.6	5	10	1
Q39818	Heat shock 22 kDa protein, mitochondrial	HSP23.9	27.18	6.34	25	4.3	1	1	1
P0CG89	Histone H4	P0CG89	13.92	11.48	22	6.8	1	1	1
I1MP04	Laccase	I1MP04	72.13	7.67	27	2.1	1	1	1
I1KZT2	Lactoylglutathione lyase	I1KZT2	38	5.76	257	12.9	3	9	1
I1MFH9	Lactoylglutathione lyase	I1MFH9	37.97	5.76	256	12.9	3	9	0
I1KUQ0	Lipoxygenase	I1KUQ0	110.37	6.7	200	6.2	6	16	1
I1KUQ3	Lipoxygenase	I1KUQ3	110.88	5.67	142	3.6	4	16	0
I1M596	Lipoxygenase	I1M596	109.64	6.21	118	8.4	8	15	3
I1MD22	Lipoxygenase	I1MD22	111.88	5.78	119	4.3	4	11	0
I1MTU1	Malate dehydrogenase	I1MTU1	43.83	5.9	23	2.8	1	1	1
I1KZL9	Mannose-6-phosphate isomerase	I1KZL9	52.49	5.71	23	1.2	1	1	1
I1JU69	Non-specific serine/threonine protein kinase	I1JU69	58.14	8.96	20	1.4	1	1	1
I1JUP4	Oleosin	I1JUP4	19.75	9.05	96	10.1	3	14	1
I1N5I8	Oleosin	I1N5I8	21.66	9.3	29	5.8	1	1	1
K7KTR9	Oleosin	K7KTR9	24.3	8.81	96	8	3	10	1
B0M1A7	Peroxisomal small heat shock protein	B0M1A7	19.45	6.98	26	6.3	1	1	1
K7M8T2	Phospholipase D	K7M8T2	90.44	6.01	28	1.4	1	2	1
I1JUM2	Plasma membrane ATPase	I1JUM2	118.35	6.48	24	1.3	1	1	1
Q9SWB4	Poly [ADP-ribose] polymerase 3	PARP3	109.27	5.41	53	3.1	2	3	1
I1JE12	Polyadenylate-binding protein	I1JE12	78.92	8.11	25	1.4	1	2	1
Q9SWB6	Probable bifunctional TENA-E protein	TENA_E	30.67	5.27	27	3.9	1	1	1
I1JBH2	Proteasome subunit alpha type	I1JBH2	28.67	4.7	32	7.2	2	2	2
I1JJI4	Proteasome subunit beta type	I1JJI4	34.26	6.79	33	2.2	1	1	1
I1K964	Proteasome subunit beta type	I1K964	27.45	5.3	39	4.7	1	1	1
I1M4K9	Protein disulfide-isomerase	I1M4K9	74.32	4.72	33	1.6	1	1	1
Q9LDM8	Putative pre-pro-subtilisin	scs1	93.58	6.89	28	3.6	4	4	4
C6SVL1	Ribosomal protein	C6SVL1	32.52	9.83	38	5.1	1	1	1
I1NB91	Ribosomal protein L19	I1NB91	31.23	11.44	26	4.4	1	2	1
Q9XES9	Seed maturation protein	PM29	18.06	9.07	62	16	3	13	1
I1N263	Small ubiquitin-related modifier	I1N263	15.08	5.47	26	8.8	1	1	1
A5JVZ7	Superoxide dismutase	A5JVZ7	31.27	8.56	49	4.6	1	1	1
I1JYA9	Superoxide dismutase	I1JYA9	31.11	8.57	74	4.6	1	2	1
I1LCI3	Superoxide dismutase	I1LCI3	32.14	5.45	40	4.9	1	1	1
I1K5G1	T-complex protein 1 subunit delta	I1K5G1	67.08	6.85	37	1.5	1	2	1
C6K8D0	Trypsin inhibitor 26 kDa isoform	C6K8D0	29.42	8.57	30	4.2	1	1	1
I1MSU1	Xylose isomerase	I1MSU1	63.74	6.01	37	3.5	2	2	2
C6SVF6	Uncharacterized protein	C6SVF6	13.75	6.05	28	12.1	1	1	1
C6SVG8	Uncharacterized protein	C6SVG8	24.87	8.05	27	3.6	1	1	1
C6SVX9	Uncharacterized protein	C6SVX9	16.72	4.65	73	20	2	4	1
C6SWA8	Uncharacterized protein	C6SWA8	10.94	9.95	27	17.4	1	1	1
C6SWE0	Uncharacterized protein	C6SWE0	21.14	5.41	25	4.9	1	1	1
C6SXG1	Uncharacterized protein	C6SXG1	21.18	5.98	129	27.9	5	11	1
C6SXX2	Uncharacterized protein	C6SXX2	20.9	5.78	214	40.9	6	21	1
C6SYG6	Uncharacterized protein	C6SYG6	24.52	4.72	32	5	1	1	1
C6SZH2	Uncharacterized protein	C6SZH2	21.31	4.55	24	4.5	1	1	1
C6SZM9	Uncharacterized protein	C6SZM9	12.39	4.62	35	8.1	1	1	1
C6T0C4	Uncharacterized protein	C6T0C4	12.77	9.69	37	18.2	2	4	1
C6T1W3	Uncharacterized protein	C6T1W3	17.41	6.36	48	25.7	3	3	2
C6T294	Uncharacterized protein	C6T294	12.93	6.71	24	12.9	1	1	1
C6T3N4	Uncharacterized protein	C6T3N4	14.63	5.09	80	44.5	3	3	1
C6T3S8	Uncharacterized protein	C6T3S8	12.53	5.67	58	16.1	1	1	1
C6T4L4	Uncharacterized protein	C6T4L4	13.4	8.69	25	7.8	1	1	1
C6T7K0	Uncharacterized protein	C6T7K0	31.31	4.84	36	5.8	1	1	1
C6TCX5	Uncharacterized protein	C6TCX5	54.18	6.26	29	2	1	1	1
C6TNZ4	Uncharacterized protein	C6TNZ4	19.27	4.93	28	13.5	1	1	1
I1J524	Uncharacterized protein	I1J524	44.19	5.05	23	1.7	1	1	1
I1J6K4	Uncharacterized protein	I1J6K4	115.48	6.23	28	0.9	1	1	1
I1J6S1	Uncharacterized protein	I1J6S1	69.37	6.94	25	1.5	1	1	1
I1J732	Uncharacterized protein	I1J732	20.26	5.56	24	10.4	2	2	2
I1J7A1	Uncharacterized protein	I1J7A1	15.6	9.88	33	8.3	1	1	1
I1J9B0	Uncharacterized protein	I1J9B0	20.64	4.99	31	5.4	1	2	1
I1J9E4	Uncharacterized protein	I1J9E4	21.07	11.02	37	7.5	1	1	1
I1J9I1	Uncharacterized protein	I1J9I1	54.88	4.92	54	3.3	1	1	1
I1JAH2	Uncharacterized protein	I1JAH2	21.6	9.06	37	5.8	1	1	1
I1JAW9	Uncharacterized protein	I1JAW9	303.24	6.41	29	0.3	1	1	1
I1JBH6	Uncharacterized protein	I1JBH6	50.56	5.36	27	2.2	1	1	1
I1JBL1	Uncharacterized protein	I1JBL1	17.95	9.47	42	7.6	1	1	1
I1JED8	Uncharacterized protein	I1JED8	23.75	6.22	38	4.6	1	1	1
I1JEH5	Uncharacterized protein	I1JEH5	21.98	4.56	28	6.4	1	1	1
I1JF83	Uncharacterized protein	I1JF83	23.91	8.61	36	15.3	2	2	2
I1JGN1	Uncharacterized protein	I1JGN1	63.53	6.76	31	2.2	1	1	1
I1JGR5	Uncharacterized protein	I1JGR5	84.81	5.2	190	11.8	7	16	1
I1JGX7	Uncharacterized protein	I1JGX7	76.48	5.19	24	1	1	1	1
I1JIH4	Uncharacterized protein	I1JIH4	57.13	5.37	33	3	1	1	1
I1JIU4	Uncharacterized protein	I1JIU4	43.36	4.86	25	2.8	1	1	1
I1JIW7	Uncharacterized protein	I1JIW7	27.16	9.48	36	3.2	1	1	1
I1JJA5	Uncharacterized protein	I1JJA5	16.77	9.39	26	7.9	1	2	1
I1JJL6	Uncharacterized protein	I1JJL6	99.58	4.96	33	2.4	2	2	2
I1JK49	Uncharacterized protein	I1JK49	80.54	5.23	23	0.7	1	1	1
I1JK94	Uncharacterized protein	I1JK94	53.08	5.89	23	1.2	1	1	1
I1JKW9	Uncharacterized protein	I1JKW9	165.66	6.96	28	0.5	1	1	1
I1JL98	Uncharacterized protein	I1JL98	21.7	5.22	157	31.2	5	10	2
I1JPG3	Uncharacterized protein	I1JPG3	36.5	10.32	26	2.4	1	1	1
I1JPW5	Uncharacterized protein	I1JPW5	56.62	5.49	138	16.4	6	11	1
I1JQD4	Uncharacterized protein	I1JQD4	8.8	11.16	28	27.3	2	2	2
I1JR44	Uncharacterized protein	I1JR44	23.56	6.32	25	7.3	1	1	1
I1JRI3	Uncharacterized protein	I1JRI3	16.29	9.37	43	11.6	1	1	1
I1JSB8	Uncharacterized protein	I1JSB8	34.16	8.97	33	3.1	1	1	1
I1JT98	Uncharacterized protein	I1JT98	19.34	5.94	30	17.4	3	3	3
I1JUJ5	Uncharacterized protein	I1JUJ5	46.84	5.17	35	2.8	1	1	1
I1JW13	Uncharacterized protein	I1JW13	33.12	7.93	38	3.9	1	1	1
I1JW21	Uncharacterized protein	I1JW21	18.8	10.24	66	11.2	2	4	1
I1JWV6	Uncharacterized protein	I1JWV6	35.87	4.13	39	3.9	1	1	1
I1JXS7	Uncharacterized protein	I1JXS7	80.09	4.78	39	2.9	1	1	1
I1JYG3	Uncharacterized protein	I1JYG3	27.12	9.52	39	5.7	2	3	2
I1JYG6	Uncharacterized protein	I1JYG6	28.76	4.43	34	14.2	2	2	2
I1JYI1	Uncharacterized protein	I1JYI1	37.88	6.16	29	3.4	1	1	1
I1JYJ4	Uncharacterized protein	I1JYJ4	44.81	7.08	44	2.2	1	1	1
I1JYK1	Uncharacterized protein	I1JYK1	30.9	7.74	56	3	1	2	1
I1JYL3	Uncharacterized protein	I1JYL3	39.3	7.1	37	4.2	1	1	1
I1JYL5	Uncharacterized protein	I1JYL5	19	5.51	29	12.9	2	2	2
I1K0C8	Uncharacterized protein	I1K0C8	69.86	4.64	25	3	1	1	1
I1K0L7	Uncharacterized protein	I1K0L7	48.06	6.37	27	2	1	1	1
I1K0U9	Uncharacterized protein	I1K0U9	23.9	6.59	32	8.6	1	1	1
I1K1X2	Uncharacterized protein	I1K1X2	24.52	5.03	38	4.3	1	1	1
I1K3U6	Uncharacterized protein	I1K3U6	57.81	6.73	39	1.7	1	1	1
I1K4Q5	Uncharacterized protein	I1K4Q5	34.47	10.18	35	8.2	2	3	1
I1K5L7	Uncharacterized protein	I1K5L7	27.03	9.72	51	10.5	2	2	1
I1K6B7	Uncharacterized protein	I1K6B7	32.69	6.32	21	4.2	1	1	1
I1K6M2	Uncharacterized protein	I1K6M2	26.89	8.26	25	9	2	2	2
I1KAG7	Uncharacterized protein	I1KAG7	63.05	4.9	43	2.3	1	2	1
I1KAK6	Uncharacterized protein	I1KAK6	31.78	6.02	26	7.6	1	1	1
I1KB09	Uncharacterized protein	I1KB09	12.96	4.67	37	40.5	2	2	2
I1KD00	Uncharacterized protein	I1KD00	94.51	6.18	60	2	2	2	2
I1KDB2	Uncharacterized protein	I1KDB2	52.42	6.09	28	3.8	1	1	1
I1KEN4	Uncharacterized protein	I1KEN4	122.23	5.52	24	0.7	1	1	1
I1KG22	Uncharacterized protein	I1KG22	91.31	5.64	42	1.4	1	1	0
I1KGP0	Uncharacterized protein	I1KGP0	35.95	9.99	50	10.7	3	3	1
I1KGY6	Uncharacterized protein	I1KGY6	89.22	5.4	42	3.1	2	2	1
I1KKW6	Uncharacterized protein	I1KKW6	77.71	6.17	21	1.1	1	1	1
I1KMB9	Uncharacterized protein	I1KMB9	87.68	4.62	35	2.9	2	2	2
I1KQC4	Uncharacterized protein	I1KQC4	20.55	9.69	32	6.4	1	1	1
I1KTJ7	Uncharacterized protein	I1KTJ7	17.97	6.84	46	6.1	1	2	1
I1KTM3	Uncharacterized protein	I1KTM3	48.39	9.63	34	2.1	1	1	1
I1KU96	Uncharacterized protein	I1KU96	67.97	8.08	41	3.4	2	2	2
I1KVR2	Uncharacterized protein	I1KVR2	35.87	9.95	44	10.7	3	4	1
I1KW97	Uncharacterized protein	I1KW97	50.21	8.36	32	2.3	1	1	1
I1KWQ7	Uncharacterized protein	I1KWQ7	15.29	9.46	24	5.5	1	1	1
I1KWT3	Uncharacterized protein	I1KWT3	42.85	5.96	49	8.8	2	2	2
I1KXQ3	Uncharacterized protein	I1KXQ3	34.14	7.07	31	8.7	2	3	2
I1KYX0	Uncharacterized protein	I1KYX0	25.83	5.54	38	4.7	1	1	1
I1KZK2	Uncharacterized protein	I1KZK2	68.02	5.6	28	3.4	2	3	2
I1KZW8	Uncharacterized protein	I1KZW8	38.28	5.24	38	4.5	1	1	1
I1L008	Uncharacterized protein	I1L008	32.78	4.92	37	3	1	3	1
I1L046	Uncharacterized protein	I1L046	80.48	5.03	23	0.9	1	1	1
I1L171	Uncharacterized protein	I1L171	51.38	5.89	29	2.7	1	1	1
I1L1K7	Uncharacterized protein	I1L1K7	52.15	5.46	36	5.1	2	2	2
I1L2C9	Uncharacterized protein	I1L2C9	166.74	5.07	27	0.5	1	1	1
I1L377	Uncharacterized protein	I1L377	29.84	5.68	27	3.4	1	1	1
I1L3L1	Uncharacterized protein	I1L3L1	36.81	5.16	28	2.4	1	1	1
I1L578	Uncharacterized protein	I1L578	257.44	5.83	28	0.5	1	1	1
I1L8Q1	Uncharacterized protein	I1L8Q1	105.7	4.99	24	0.8	1	1	1
I1LA68	Uncharacterized protein	I1LA68	9.58	4.98	27	17.7	1	1	1
I1LAL4	Uncharacterized protein	I1LAL4	73.54	5.99	50	5.6	4	6	1
I1LBA2	Uncharacterized protein	I1LBA2	55.2	4.98	27	1.7	1	1	1
I1LBN1	Uncharacterized protein	I1LBN1	18.3	7.9	32	5.3	1	4	1
I1LDC1	Uncharacterized protein	I1LDC1	30.37	4.76	117	29.8	4	4	1
I1LDV5	Uncharacterized protein	I1LDV5	139.82	6.07	42	1.2	1	1	1
I1LF06	Uncharacterized protein	I1LF06	66.86	5.58	40	2.5	1	1	1
I1LG37	Uncharacterized protein	I1LG37	194.61	7.27	43	0.5	1	2	1
I1LH04	Uncharacterized protein	I1LH04	18.62	6.97	29	6	1	1	1
I1LIH7	Uncharacterized protein	I1LIH7	13.58	6.95	31	12.4	1	1	1
I1LIL5	Uncharacterized protein	I1LIL5	41.06	8.68	20	1.8	1	1	1
I1LIQ4	Uncharacterized protein	I1LIQ4	31.46	4.78	36	5.8	1	1	1
I1LIY4	Uncharacterized protein	I1LIY4	166.2	4.63	25	1.1	1	1	1
I1LJZ1	Uncharacterized protein	I1LJZ1	123.82	5.58	45	1.2	2	2	1
I1LK73	Uncharacterized protein	I1LK73	24.33	10.24	52	8.6	1	1	1
I1LK74	Uncharacterized protein	I1LK74	44.31	5.68	22	2.2	1	1	1
I1LKS7	Uncharacterized protein	I1LKS7	91.51	5.31	61	4.8	2	3	1
I1LLR7	Uncharacterized protein	I1LLR7	60.19	7.26	20	2.7	1	1	1
I1LM14	Uncharacterized protein	I1LM14	53.85	6.36	57	2.6	1	1	1
I1LN74	Uncharacterized protein	I1LN74	24.77	7.46	38	8	1	1	1
I1LPJ9	Uncharacterized protein	I1LPJ9	99.35	5.36	55	3.5	2	4	1
I1LQR8	Uncharacterized protein	I1LQR8	28.59	8.13	30	6.9	2	2	2
I1LUU2	Uncharacterized protein	I1LUU2	28.41	7.03	37	5.2	1	1	1
I1LV12	Uncharacterized protein	I1LV12	87.63	9.05	27	1.6	1	1	1
I1LVD3	Uncharacterized protein	I1LVD3	19.51	9.15	41	6	1	2	1
I1LVH0	Uncharacterized protein	I1LVH0	45.03	7.05	35	2.9	1	1	1
I1LVZ1	Uncharacterized protein	I1LVZ1	57.6	9.19	27	1.4	1	1	1
I1LWR7	Uncharacterized protein	I1LWR7	18.91	10.18	61	11.2	2	4	1
I1LX28	Uncharacterized protein	I1LX28	25.7	9.6	71	6.1	1	1	1
I1LXY1	Uncharacterized protein	I1LXY1	101.84	6.33	50	2.9	3	4	2
I1LY94	Uncharacterized protein	I1LY94	28.46	9.5	24	2.3	1	1	1
I1LYE4	Uncharacterized protein	I1LYE4	50.91	7	186	17.1	6	21	1
I1M026	Uncharacterized protein	I1M026	66.2	7.15	33	2.8	2	2	1
I1M0J3	Uncharacterized protein	I1M0J3	157.3	5.66	28	0.4	1	1	1
I1M186	Uncharacterized protein	I1M186	13.95	6.79	27	9.2	1	1	1
I1M1E3	Uncharacterized protein	I1M1E3	16.68	10.32	35	8.3	1	1	1
I1M1P1	Uncharacterized protein	I1M1P1	36.66	5.94	40	4.5	1	1	1
I1M2L7	Uncharacterized protein	I1M2L7	38.19	6.39	25	1.9	1	1	1
I1M4I4	Uncharacterized protein	I1M4I4	24.52	4.87	34	4.2	1	1	1
I1M4U9	Uncharacterized protein	I1M4U9	44.15	8.24	26	2.3	1	1	1
I1M561	Uncharacterized protein	I1M561	40.59	5.29	35	2.4	1	1	1
I1M592	Uncharacterized protein	I1M592	65.47	6.89	26	1.5	1	1	1
I1M5M5	Uncharacterized protein	I1M5M5	60	4.87	62	4.2	1	1	1
I1M8R6	Uncharacterized protein	I1M8R6	14.2	4.53	25	15.4	2	2	1
I1M8Y5	Uncharacterized protein	I1M8Y5	70.27	4.98	25	2	1	1	1
I1M965	Uncharacterized protein	I1M965	21.35	5.49	46	10.7	2	6	1
I1MBN1	Uncharacterized protein	I1MBN1	91.12	6.42	26	0.7	1	1	1
I1MDN0	Uncharacterized protein	I1MDN0	19.74	4.83	34	6.4	1	1	1
I1MDY1	Uncharacterized protein	I1MDY1	17.6	5.11	43	25.8	3	3	1
I1MGE4	Uncharacterized protein	I1MGE4	14.27	4.95	56	33.6	3	3	1
I1MGM0	Uncharacterized protein	I1MGM0	23.21	4.57	37	5.4	1	2	1
I1MLW9	Uncharacterized protein	I1MLW9	41.45	6.2	35	2.2	1	1	1
I1MN40	Uncharacterized protein	I1MN40	48.77	4.61	31	3	1	1	1
I1MTK8	Uncharacterized protein	I1MTK8	14.28	8.29	32	8.2	1	1	1
I1MUN0	Uncharacterized protein	I1MUN0	24.74	7.79	26	7.8	2	3	2
I1MUT2	Uncharacterized protein	I1MUT2	51.67	4.93	48	10.9	5	6	2
I1MXD1	Uncharacterized protein	I1MXD1	74.19	5.57	147	12.9	7	8	1
I1MYV2	Uncharacterized protein	I1MYV2	90.23	4.62	30	3	2	2	2
I1N0K1	Uncharacterized protein	I1N0K1	42.03	6.4	27	4.3	1	1	1
I1N1F9	Uncharacterized protein	I1N1F9	66.48	6.69	40	3	2	2	1
I1N1X2	Uncharacterized protein	I1N1X2	63.58	5.48	39	2.5	1	1	1
I1N404	Uncharacterized protein	I1N404	43.12	9.06	30	3.4	1	1	1
I1N520	Uncharacterized protein	I1N520	41.47	6.13	31	2.5	1	1	1
I1N5J4	Uncharacterized protein	I1N5J4	67.62	5.82	44	3.3	2	2	2
I1N5X5	Uncharacterized protein	I1N5X5	18.75	6.41	35	5.6	1	1	1
I1N627	Uncharacterized protein	I1N627	36.17	5.11	36	3.8	1	1	1
I1N675	Uncharacterized protein	I1N675	46.05	4.68	89	19.8	5	8	1
I1NAI7	Uncharacterized protein	I1NAI7	56.41	5.4	143	16.4	6	11	1
I1NB44	Uncharacterized protein	I1NB44	37.66	7.71	49	8.2	2	2	1
I1NBA5	Uncharacterized protein	I1NBA5	31.21	9.28	31	14	3	4	3
I1NBV4	Uncharacterized protein	I1NBV4	40.07	5.47	41	4.1	1	1	1
I1NF56	Uncharacterized protein	I1NF56	19.9	6.29	24	7.7	1	1	1
I1NGF4	Uncharacterized protein	I1NGF4	55.54	5.88	1458	34.4	17	104	0
I1NHW4	Uncharacterized protein	I1NHW4	73.93	5.75	45	5.6	4	7	1
K7K113	Uncharacterized protein	K7K113	98.84	6.61	29	1	1	2	1
K7K5C8	Uncharacterized protein	K7K5C8	118.49	5.01	31	0.6	1	1	1
K7KBH5	Uncharacterized protein	K7KBH5	13.15	8.01	25	9.8	1	1	1
K7KGB2	Uncharacterized protein	K7KGB2	13.35	4.62	125	27	2	3	1
K7KQC0	Uncharacterized protein	K7KQC0	137.81	4.61	29	0.6	1	3	1
K7KQN4	Uncharacterized protein	K7KQN4	150.49	4.48	38	1.2	1	1	1
K7KQU4	Uncharacterized protein	K7KQU4	65.86	8.46	32	2.1	1	1	1
K7KWN5	Uncharacterized protein	K7KWN5	43.98	4.87	104	11.1	2	3	1
K7KYD6	Uncharacterized protein	K7KYD6	79.62	4.65	50	3.1	1	1	1
K7L1G3	Uncharacterized protein	K7L1G3	10.11	4.76	33	22.8	1	1	1
K7L359	Uncharacterized protein	K7L359	87.5	5.23	24	1.1	1	1	1
K7L505	Uncharacterized protein	K7L505	12.2	6.64	30	25.3	3	4	3
K7L7W3	Uncharacterized protein	K7L7W3	9.45	9.05	31	16.4	1	1	1
K7LEQ0	Uncharacterized protein	K7LEQ0	30.67	6.14	29	2.1	1	1	1
K7LFP0	Uncharacterized protein	K7LFP0	30.98	6.97	36	4.8	1	1	1
K7LFW3	Uncharacterized protein	K7LFW3	43.49	5.69	26	2.2	1	1	1
K7LKJ0	Uncharacterized protein	K7LKJ0	10.96	6.18	81	48.1	3	4	1
K7LSM2	Uncharacterized protein	K7LSM2	185.95	4.7	48	1.8	3	3	1
K7LUR7	Uncharacterized protein	K7LUR7	10.53	5.28	35	22.9	1	1	1
K7LVJ4	Uncharacterized protein	K7LVJ4	217.45	5.8	23	0.4	1	1	1
K7MAL7	Uncharacterized protein	K7MAL7	150.14	5.64	30	0.7	1	1	1
K7MIE7	Uncharacterized protein	K7MIE7	29.79	6.04	993	64.2	15	66	0
K7MQU7	Uncharacterized protein	K7MQU7	30.93	9.4	46	3	1	1	1
K7MVC1	Uncharacterized protein	K7MVC1	87.14	6.06	38	1.8	1	1	1
K7MVD3	Uncharacterized protein	K7MVD3	83.34	5.1	212	14.2	8	19	0
K7MVZ4	Uncharacterized protein	K7MVZ4	60.45	6.62	23	1.1	1	1	1
K7MX62	Uncharacterized protein	K7MX62	21.86	9.34	60	11	2	3	1
K7MXV2	Uncharacterized protein	K7MXV2	83.38	8.32	21	3.8	2	2	1
K7N0E2	Uncharacterized protein	K7N0E2	11.89	5.71	29	9.1	1	1	1
I1JPI3	Uncharacterized protein (Fragment)	I1JPI3	83.27	6.68	30	1.1	1	1	1
I1KH30	Uncharacterized protein (Fragment)	I1KH30	17.82	5.6	28	5.1	1	1	1
I1MAT1	Uncharacterized protein (Fragment)	I1MAT1	23.08	7.03	54	6.5	1	1	1
I1NGB9	Uncharacterized protein (Fragment)	I1NGB9	42.29	5.42	44	2	1	1	1
K7KUJ1	Uncharacterized protein (Fragment)	K7KUJ1	50.6	5.54	106	6.3	3	10	1
