# Supplementary material for: Extracellular Proteome Analysis and Flavor Formation During Soy Sauce Fermentation
Source: Front Microbiol. 2018 Aug 15;9:1872. doi: 10.3389/fmicb.2018.01872 (PMC6104182; doi:10.3389/fmicb.2018.01872)
Supplement: Supplementary file 5 [file Table_5.XLSX]

## Sheet: Table s5
Table s5 The flavors of soy sauce that determined using HS-SPME combined with GC-MS
retention time	peak area	peak area%	content (mg/L)	No of CAS	molecular weight	flavors
2.284	692296	1.35	31.3927	78-83-1	74	1-Propanol, 2-methyl-
3.811	5659763	11.06	256.646	123-51-3	88	1-Butanol, 3-methyl-
17.404	15825681	30.92	717.627	60-12-8	122	Phenylethyl Alcohol
1.559	6768905	13.22	306.941	64-17-5	46	Ethanol
3.893	2852472	5.57	129.347	137-32-6	88	1-Butanol, 2-methyl-
7.197	2172309	4.24	98.5049	98-00-0	98	2-Furanmethanol
4.948	432508	0.84	19.6124	513-85-9	90	2,3-Butanediol
1.727	279504	0.55	12.6743	75-08-1	62	Ethanethiol
5.227	216290	0.42	9.80783	24347-58-8	90	2,3-Butanediol, [R-(R*,R*)]-
13.453	157096	0.31	7.12363	4379-16-2	128	Cyclopropanemethanol, .alpha.-butyl-
15.524	111998	0.22	5.07863	77411 - 76 - 8	140	3,5-Heptadien-2-ol, 2,6-dimethyl-
14.111	101076	0.2	4.58336	58175-57-8	130	2-Propyl-1-pentanol
12.143	93881	0.18	4.2571	3391-86-4	128	1-Octen-3-ol
13.927	88618	0.17	4.01845	22427-95-8	198	3,7-Decadiene-5,6-diol, 4,7-dimethyl-
6.66	78277	0.15	3.54953	626-89-1	102	1-Pentanol, 4-methyl-
16.714	53633	0.1	2.43203	59303-05-8	128	2-Furanmethanethiol, 5-methyl-
12.056	36611	0.07	1.66015	505-10-2	106	1-Propanol, 3-(methylthio)-
7.369	501143	0.98	22.7247	116-53-0	102	Butanoic acid, 2-methyl-
4.316	145952	0.29	6.6183	79-31-2	88	Propanoic acid, 2-methyl-
7.015	125981	0.25	5.7127	503-74-2	102	Butanoic acid, 3-methyl-
7.96	49907	0.1	2.26307	502 - 50 - 1	174	4-Ketopimelic
10.492	16107	0.03	0.730384	1538-75-6	186	2,2-Dimethylpropanoic anhydride
2.165	1380296	2.7	62.5905	141-78-6	88	Ethyl Acetate
5.794	450364	0.88	20.4221	687-47-8	118	Propanoic acid, 2-hydroxy-, ethyl ester, (S)-
26.259	386755	0.76	17.5377	91-08-7	174	Benzene, 1,3-diisocyanato-2-methyl-
26.511	134195	0.26	6.08517	584-84-9	174	Benzene, 2,4-diisocyanato-1-methyl-
22.942	122543	0.24	5.5568	103-45-7	164	Acetic acid, 2-phenylethyl ester
9.134	69742	0.14	3.1625	3682-43-7	144	Pentanoic acid, 4-methyl-2-oxo-, methyl ester
10.546	52325	0.1	2.37272	13170-00-8	142	Butyric acid, 2,2-dimethyl-, vinyl ester
22.471	34781	0.07	1.57717	101-97-3	164	Benzeneacetic acid, ethyl ester
8.05	35720	0.07	1.61975	123-92-2	130	1-Butanol, 3-methyl-, acetate
36.449	28818	0.06	1.30677	10522-34-6	214	Propanoic acid, 2-methyl-, nonyl ester
3.542	23023	0.04	1.04399	623-42-7	102	Butanoic acid, methyl ester
8.116	16557	0.03	0.750789	624-41-9	130	1-Butanol, 2-methyl-, acetate
13.655	11412	0.02	0.517485	1515-80-6	126	2,4-Hexadienoic acid, methyl ester
7.268	445062	0.87	20.1817	110-12-3	114	2-Hexanone, 5-methyl-
1.637	422031	0.82	19.1373	67-64-1	58	Acetone
2.051	415117	0.81	18.8238	78-93-3	72	2-Butanone
6.942	346682	0.68	15.7205	25368-54-1	144	8-Hydroxy-2-octanone
5.614	213008	0.42	9.659	3188-00-9	100	3(2H)-Furanone, dihydro-2-methyl-
10.909	75039	0.15	3.4027	585-25-1	142	2,3-Octanedione
3.08	73459	0.14	3.33105	565-69-5	100	3-Pentanone, 2-methyl-
11.956	52778	0.1	2.39326	89053-56-5	186	1,3-Dioxolan-4-one, 2-(1,1-dimethylethyl)-5-(1-methylethyl)-, (2S-cis)-
2.936	38693	0.08	1.75456	107-87-9	86	2-Pentanone
8.508	30198	0.06	1.36935	110-43-0	114	2-Heptanone
11.05	32751	0.06	1.48512	928-68-7	128	2-Heptanone, 6-methyl-
8.612	26351	0.05	1.19491	108-94-1	98	Cyclohexanone
10.271	25184	0.05	1.14199	19549-84-9	142	3,5-Dimethyl-4-heptanone
12.308	15685	0.03	0.711248	110-93-0	126	5-Hepten-2-one, 6-methyl-
9.277	1511797	2.95	68.5535	108-50-9	108	Pyrazine, 2,6-dimethyl-
12.729	703928	1.38	31.9201	13925-03-6	122	Pyrazine, 2-ethyl-6-methyl-
12.879	583718	1.14	26.4691	14667-55-1	122	Pyrazine, trimethyl-
15.949	350952	0.69	15.9142	13360-65-1	136	Pyrazine, 3-ethyl-2,5-dimethyl-
6.134	175978	0.34	7.97985	109-08-0	94	Pyrazine, methyl-
9.486	88261	0.17	4.00226	5910-89-4	108	Pyrazine, 2,3-dimethyl-
15.073	68352	0.13	3.09947	15986-81-9	136	2-Methyl-3-isopropylpyrazine
9.415	59792	0.12	2.71131	13925-00-3	108	Pyrazine, ethyl-
18.294	61685	0.12	2.79715	13925-06-9	150	2-Isobutyl-3-methylpyrazine
22.74	61816	0.12	2.80309	15987-00-5	150	2-Butyl-3-methylpyrazine
16.204	44311	0.09	2.00931	13925-07-0	136	Pyrazine, 2-ethyl-3,5-dimethyl-
25.026	38447	0.08	1.74341	18433-98-2	178	Pyrazine, 2,5-dimethyl-3-(3-methylbutyl)-
19.138	31981	0.06	1.4502	17398-16-2	150	2,3,5-Trimethyl-6-ethylpyrazine
20.811	18467	0.04	0.8374	32736-94-0	164	Pyrazine, 2,5-dimethyl-3-(2-methylpropyl)-
19.057	15747	0.03	0.714059	18138-05-1	150	Pyrazine, 3,5-diethyl-2-methyl-
16.344	513131	1	23.2683	90-05-1	124	Phenol, 2-methoxy-
23.704	265599	0.52	12.0438	2785-89-9	152	Phenol, 4-ethyl-2-methoxy-
2.666	670318	1.31	30.3961	96-17-3	86	Butanal, 2-methyl-
17.16	99647	0.19	4.51857	124-19-6	142	Nonanal
2.566	139021	0.27	6.30401	590-86-3	86	Butanal, 3-methyl-
5.445	79217	0.15	3.59215	66-25-1	100	Hexanal
1.863	210686	0.41	9.55371	78-84-2	72	Propanal, 2-methyl-
14.655	71802	0.14	3.25591	122-78-1	120	Benzeneacetaldehyde
3.238	131340	0.26	5.95571	625-86-5	96	Furan, 2,5-dimethyl-
9.227	37882	0.07	1.71779	1192-62-7	110	Ethanone, 1-(2-furanyl)-
3.644	19024	0.04	0.862657	3299-32-9	116	1,3-Dioxolane, 2,4,5-trimethyl-
3.715	41603	0.08	1.88652	691-37-2	84	1-Pentene, 4-methyl-
4.519	39843	0.08	1.80671	108-88-3	92	Toluene
9.63	35426	0.07	1.60642	30408-61-8	125	Oxazole, 4-ethyl-2,5-dimethyl-
9.887	37909	0.07	1.71901	13937-89-8	125	Pyrrolidine, 1-(1-butenyl)-
15.213	40209	0.08	1.82331	3891-98-3	212	Dodecane, 2,6,10-trimethyl-
27.971	255667	0.5	11.5934	0-00-0	148	1H-Imidazo[4,5-b]pyridin-2-amine, 5-methyl-
15.43	304699	0.6	13.8168	1072-83-9	109	Ethanone, 1-(1H-pyrrol-2-yl)-
3.973	202783	0.4	9.19534	624-92-0	94	Disulfide, dimethyl
8.851	50669	0.1	2.29762	4437-22-3	178	Furan, 2,2'-[oxybis(methylene)]bis-
